# Supplementary material
Source: HighWire-hosted journal article supplement (doi:10.1101/rna.080611.125)
Supplement: Supplemental_DataSet1.xlsx [file Supplemental_DataSet1.xlsx]

## Sheet: Figure 1 and 2 Data
	OMA1[1-182] : PRE					OMA1[98-182] : PRE					MBP-OMA1[1-182] : PRE					MBP-OMA1[1-182] AAA : PRE					MBP-OMA1[1-182] KKK : PRE					MBP-OMA1[1-182] : frag6					MBP-OMA1[1-182] AAA : frag6				MBP-OMA1[1-182] KKK : frag6					MBP-OMA1[1-182] : seq1					MBP-OMA1[1-182] AAA : seq1
	[oma1] nM	% bound				[oma1] nM	% bound				[oma1] nM	% bound				[oma1] nM	% bound				[oma1] nM	% bound				[oma1] nM	% bound				[oma1] nM	% bound			[oma1] nM	% bound				[oma1] nM	% bound				[oma1] nM	% bound
	5000	96.1146	100	100		2222.22	91.232	91.2259	82.4487		5000	99.8571	100	97.4395		20000	89.8308	88.3992	88.1997		25000	98.726	99.0183	100.373		7500	100	98.5718	101.944		6666.67	97.8458	91.8894		10000	95.8131	100.127	94.4467		292.638	100	100	100		10000	96.7045	99.6879	101.461
	3333.33	93.172	100	100		1481.48	90.5737	90.9697	90.6225		3333.33	100.132	90.256	103.099		13333.3	81.4964	81.0578	78.9378		16666.7	99.4551	99.6979	99.366		5000	98.6972	95.6571	96.1985		4444.44	95.3038	92.2561		6666.67	94.9787	97.5385	94.2979		195.092	100	100	100		6666.67	95.2533	94.7704	96.1706
	2222.22	93.0307	92.9126	97.4516		987.654	82.3905	90.5472	87.1942		2222.22	96.944	82.9732	92.7712		8888.89	72.6197	73.4425	74.5668		11111.1	103.967	101.047	99.8809		3333.33	97.3219	97.619	100.546		2962.96	89.7523	83.8774		4444.44	98.475	101.894	100.653		130.061	100	96.1789	100		4444.44	98.0304	106.676	101.895
	1481.48	87.2351	89.2304	93.1543		658.436	67.9277	83.5535	80.4752		1481.48	91.438	73.014	91.0693		5925.93	55.5893	56.9233	63.5025		7407.41	99.2114	100.361	100.555		2222.22	99.2961	100.856	95.4771		1975.31	80.9348	77.4613		2962.96	96.7003	98.2745	106.855		86.7076	100	96.1978	100		2962.96	100.997	100.178	95.5204
	987.654	84.084	77.9643	88.8728		438.957	62.9049	56.9048	48.0729		987.654	87.3501	69.7462	73.1669		3950.62	41.7927	39.501	49.9146		4938.27	101.314	97.8735	95.8845		1481.48	99.2076	102.955	101.309		1316.87	71.1397	59.9841		1975.31	104.736	101.38	101.743		57.8051	100	87.6328	100		1975.31	100.014	103.919	106.005
	658.436	74.1252	75.0922	83.3816		292.638	55.9464	47.9112	40.7615		658.436	74.7013	59.6617	59.4173		2633.74	26.7199	23.7853	32.714		3292.18	99.1062	88.7109	87.8008		987.654	95.2746	101.569	101.334		877.915	54.3076	45.7628		1316.87	104.995	100.61	106.748		38.5367	66.081	76.0008	84.7648		1316.87	111.372	96.1533	100.442
	438.957	56.3812	61.8199	73.1759		195.092	38.7528	23.5001	12.4368		438.957	61.213	45.5407	55.2068		1755.83	11.669	12.0534	24.6112		2194.79	100.709	85.3028	84.1376		658.436	98.9998	102.457	103.254		585.277	30.2448	27.7418		877.915	107.585	100.167	95.2568		25.6912	42.7736	60.6182	71.3612		877.915	97.6602	104.358	105.253
	292.638	38.2434	37.805	56.891		130.061	22.7784	8.58822	0		292.638	51.6549	28.1496	32.239		1170.55	4.59589	5.59046	12.531		1463.19	91.4462	76.3862	71.985		438.957	100.99	102.944	101.731		390.184	17.7146	14.4171		585.277	101.044	94.0325	100.154		17.1274	27.554	42.5674	50.1501		585.277	102.577	87.8421	94.735
	195.092	14.7151	25.2142	28.7966		86.7076	9.70549	2.88922	0		195.092	38.7534	17.088	23.9486		780.369	1.00723	1.40291	5.08172		975.461	85.2037	72.5321	64.1562		292.638	93.1	99.0171	101.926		260.123	12.8602	9.94745		390.184	99.6963	94.9934	107.044		11.4183	12.628	26.5869	35.7037		390.184	93.7772	92.3992	92.8747
	130.061	6.32464	11.6358	11.411		57.8051	3.62879	0	0		130.061	23.2182	9.52737	14.1321		520.246	2.04692	0	1.47873		650.307	80.9805	67.3065	51.5081		195.092	83.6947	91.5086	98.4634		173.415	10	4.62421		260.123	98.1764	90.7774	99.7321		7.61219	1	8.03102	15.1796		260.123	84.6655	78.511	79.7904
	86.7076	0.890007	4.83617	5.64661		38.5367	0	0	0		86.7076	11.7578	5.75387	4.64786		346.831	0	0	1.03141		433.538	61.178	57.5814	39.5336		130.061	78.5044	80.6056	87.8216		115.61	5.50485	3.33052		173.415	92.6589	85.4475	97.5874		5.0748	0	0	4.86122		173.415	73.7843	71.4868	68.9903
	57.8051	0	1	3.63705							57.8051	6.79622	4.43972	3.815		231.22	0	0	0		289.025	55.6759	49.5499	24.3297		86.7076	63.1148	76.0894	80.7417		77.0735	6.56046	3.67876		115.61	87.7895	82.4642	100.06		3.3832	0	0	0		115.61	62.9969	52.8541	53.147
	38.5367	0	0	0							38.5367	3.70986	4.44173	1.98301							192.684	28.6155	30.2226	18.3372		57.8051	54.6947	59.7293	62.2564		51.3823	3.79884	3.01952		77.0735	79.4491	67.3329	77.137		2.25546	0	0	0		77.0735	51.0907	47.2278	45.0935
	25.6912	0	0	0							25.6912	6.14329	2.56413	0							128.456	21.3912	20.0741	7.00749		38.5367	37.6616	51.6697	60.1772		34.2549	0	0		51.3823	60.1321	53.1251	81.98		1.50364	0	0	0		51.3823	44.517	32.8548	32.839
											17.1274	4.07055	0	0							85.6372	8.22392	9.50514	1.41069		25.6912	26.7977	18.8117	24.729		22.8366	0	0		34.2549	42.5791	37.1887	50.583		1.00243	0	0	0		34.2549	35.4742	27.2091	22.6939
											11.4183	0	0	0							57.0915	10.0394	4.29459	1.15704		17.1274	9.1569	10.8066	15.0063						22.8366	26.9741	22.5793	43.2767		0.668286	0	0	0		22.8366	26.1394	20.6095	17.2609
											7.61219	0	0	0							38.061	4.65362	2.89441	0		11.4183	5.55353	9.07917	7.1492						15.2244	39.9948	13.2678	24.4986		0.445524	0	0	0		15.2244	32.3887	15.3437	12.1409
																					25.374	1.61741	2.46882	0		7.61219	0	3.06755	2.57811						10.1496	11.7348	6.25333	15.5698		0	0	0	0		10.1496	13.2915	9.48684	7.48063
																					16.916	0.897332	1.81625	0		5.0748	0	1.29457	1.62352						6.76639	11.7135	5.21271	9.09555							6.76639	12.7709	7.72351	3.61193
																					11.2773	0	2.79391	0		3.3832	0	0	0						4.51093	4.31567	6.04205	6.18501							4.51093	6.5116	0	0
																					7.51822	0	0	0		2.25546	0	0	0						3.00729	4.09604	0	0							3.00729	8.56937	0	0
																																			2.00486	1.28578	0	0							2.00486	0.970437	0	0
																																			1.33657	0	0	0							1.33657	0	0	0
																																			0.891048	0	0	0							0.891048	0	0	0
																																													0	0	0	0
[truncated: 4 more columns]

## Sheet: Figure 3 Data
WRM66_ctrlRNAi_NGM_Total_Brood	WRM66_GFPRNAi_NGM_Total_Brood	WRM66_ctrlRNAi_KNAA_Total_Brood	WRM66_GFPRNAi_KNAA_Total_Brood	WRM66_ctrlRNAi_NGM_Total_Viable	WRM66_GFPRNAi_NGM_Total_Viable	WRM66_ctrlRNAi_KNAA_Total_Viable	WRM66_GFPRNAi_KNAA_Total_Viable
218	222	189	0	218	222	189	0
203	221	115	0	203	221	115	0
104	233	184	2	104	233	184	2
139	215	225	2	139	215	225	2
189	254	171	0	189	254	171	0
173	270	144	0	170	270	144	0
219	225	80	0	219	225	80	0
36	138	214	0	36	138	214	0
183	181	196	0	182	181	196	0
149	203	186	0	149	203	186	0
161	201	177	0	161	201	177	0
197	228	219	0	197	228	219	0
157	210	165	0	157	210	165	0
173	187	156	0	173	187	153	0
178	83	163	0	178	67	163	0
220	156	61	0	220	156	61	0
187	228	106	0	187	228	106	0
93	255	184	1	92	255	184	1
46	98	191	6	46	98	191	6
104	119	188	4	98	119	188	4
158	236	75	3	155	236	75	3
109	144	89	2	109	144	89	2
134	228	217	1	134	228	217	1
172	186	198	1	172	186	198	1
198	167	82	0	198	167	82	0
227	190	199	4	227	190	198	4
170	220	98	0	170	220	95	0
203	247	111	0	203	247	92	0
185	227	119	0	185	227	119	0
173	205	191	4	173	205	191	4
173	154	133	2	168	154	133	2
140	217	126	0	133	217	126	0
172	209	79	1	171	195	79	1
232	143	137	0	232	143	137	0
225	108	136	0	225	105	136	0
103	249	127	0	99	249	127	0
213	221	109	0	202	221	98	0
172	194	111	0	167	194	111	0
225	134	189	0	225	134	189	0
166	245	176	1	163	245	176	1
161	184	145	3	159	184	145	3
235	197	125	5	235	197	124	5
236	161	77	0	236	160	76	0
	163	148	3		163	137	3
	178	91	2		178	91	2
	188	140			185	139
	223	158			223	158
	169	75			169	68
	185	89			183	87
	218	120			218	114
	264	141			264	127
		62				60
		170				165
		105				105
		96				75
		81				76
		154				149
		133				133
		141				139
		111				111
		127				113
		118				110
		129				127
		173				171
		181				173
		176				176
		97				97
		154				154
		110				110
		130				130
		108				108
		108				105
		148				137
		162				157
		140				139
		158				158
		75				68
		89				87
		120				114
		141				127
		62				60
		170				165
		105				105

## Sheet: Figure 3 Statistics
Analysis of Variance (One-Way) for WRM66 Brood
Descriptive Statistics
Groups	Sample size	Sum	Variance	Std Dev	Mean	95% Confidence Interval*
WRM66_ctrlRNAi_KNAA_Total_Brood	83	11359	1748.64	41.8167	136.855	127.724	145.986
WRM66_ctrlRNAi_NGM_Total_Brood	43	7311	2283.26	47.7835	170.023	155.318	184.729
WRM66_GFPRNAi_KNAA_Total_Brood	45	47	2.54343	1.59481	1.04444	0.565309	1.52358
WRM66_GFPRNAi_NGM_Total_Brood	51	9981	1894.93	43.5308	195.706	183.463	207.949
Total	222		6223.15	78.8869	129.27
Confidence intervals are calculated using individual standard deviations.
ANOVA
Source of Variation	d.f.	SS	MS	F	p-value	F crit	Omega Sqr.
Between Groups	3	1.04117e+06	347057	226.425	0	2.64601	0.75286
Within Groups	218	334144	1532.77
Total	221	1.37532e+06
Model summary
R-Squared	0.757042
Adjusted R-Squared	0.753699
Residual standard error	39.1506
Coefficient of Variation	0.302858
Homogeneity of Variances
Hartley Fmax		897.708	p-value	< 0.001
Cochran C		0.385076	p-value	0.00511751
Bartlett's Chi-square (d.f. = 3)		241.52	p-value	0
Levene's F (Based on mean)		25.4121	p-value	3.87468e-14
Brown-Forsythe (Based on median)		24.1095	p-value	1.63536e-13
Comparisons among groups (Factor 1 - Factor #1)
Scheffe
Group vs. Group (Contrast)	Difference	95% Confidence Interval		Test Statistic	p-value
WRM66_ctrlRNAi_KNAA_Total_Brood vs WRM66_ctrlRNAi_NGM_Total_Brood	-33.1678	-53.8934	-12.4422	4.50886	0.000217399
WRM66_ctrlRNAi_KNAA_Total_Brood vs WRM66_GFPRNAi_KNAA_Total_Brood	135.811	115.391	156.231	18.7386	0
WRM66_ctrlRNAi_KNAA_Total_Brood vs WRM66_GFPRNAi_NGM_Total_Brood	-58.8505	-78.4761	-39.2248	8.44857	2.32592e-13
WRM66_ctrlRNAi_NGM_Total_Brood vs WRM66_GFPRNAi_KNAA_Total_Brood	168.979	145.456	192.502	20.2392	0
WRM66_ctrlRNAi_NGM_Total_Brood vs WRM66_GFPRNAi_NGM_Total_Brood	-25.6826	-48.5197	-2.84559	3.16852	0.0199984
WRM66_GFPRNAi_KNAA_Total_Brood vs WRM66_GFPRNAi_NGM_Total_Brood	-194.661	-217.221	-172.101	24.3107	0
Tukey-Kramer
Groups	Difference	Test Statistic	p-value	Significant
WRM66_ctrlRNAi_KNAA_Total_Brood vs WRM66_ctrlRNAi_NGM_Total_Brood	-33.1678	6.37649	0.746271	No
WRM66_ctrlRNAi_KNAA_Total_Brood vs WRM66_GFPRNAi_KNAA_Total_Brood	135.811	26.5004	0.74626	No
WRM66_ctrlRNAi_KNAA_Total_Brood vs WRM66_GFPRNAi_NGM_Total_Brood	-58.8505	11.9481	0.74626	No
WRM66_ctrlRNAi_NGM_Total_Brood vs WRM66_GFPRNAi_KNAA_Total_Brood	168.979	28.6225	0.74626	No
WRM66_ctrlRNAi_NGM_Total_Brood vs WRM66_GFPRNAi_NGM_Total_Brood	-25.6826	4.48096	0.748333	No
WRM66_GFPRNAi_KNAA_Total_Brood vs WRM66_GFPRNAi_NGM_Total_Brood	-194.661	34.3805	0.74626	No
Bonferroni
Alpha/N	0.00833333
Group vs. Group (Contrast)	Difference	95% Confidence Interval		Test Statistic	p-value
WRM66_ctrlRNAi_KNAA_Total_Brood vs WRM66_ctrlRNAi_NGM_Total_Brood	-33.1678	-52.7539	-13.5817	4.50886	6.38453e-05
WRM66_ctrlRNAi_KNAA_Total_Brood vs WRM66_GFPRNAi_KNAA_Total_Brood	135.811	116.514	155.108	18.7386	0
WRM66_ctrlRNAi_KNAA_Total_Brood vs WRM66_GFPRNAi_NGM_Total_Brood	-58.8505	-77.3971	-40.3039	8.44857	2.53131e-14
WRM66_ctrlRNAi_NGM_Total_Brood vs WRM66_GFPRNAi_KNAA_Total_Brood	168.979	146.749	191.209	20.2392	0
WRM66_ctrlRNAi_NGM_Total_Brood vs WRM66_GFPRNAi_NGM_Total_Brood	-25.6826	-47.2641	-4.10117	3.16852	0.0105118
WRM66_GFPRNAi_KNAA_Total_Brood vs WRM66_GFPRNAi_NGM_Total_Brood	-194.661	-215.981	-173.342	24.3107	0
Fisher LSD
Group vs. Group (Contrast)	Difference	Test Statistic	p-value	Significant
WRM66_ctrlRNAi_KNAA_Total_Brood vs WRM66_ctrlRNAi_NGM_Total_Brood	-33.1678	4.50886	1.05962e-05	Yes
WRM66_ctrlRNAi_KNAA_Total_Brood vs WRM66_GFPRNAi_KNAA_Total_Brood	135.811	18.7386	0	Yes
WRM66_ctrlRNAi_KNAA_Total_Brood vs WRM66_GFPRNAi_NGM_Total_Brood	-58.8505	8.44857	3.9968e-15	Yes
WRM66_ctrlRNAi_NGM_Total_Brood vs WRM66_GFPRNAi_KNAA_Total_Brood	168.979	20.2392	0	Yes
WRM66_ctrlRNAi_NGM_Total_Brood vs WRM66_GFPRNAi_NGM_Total_Brood	-25.6826	3.16852	0.00174989	Yes
WRM66_GFPRNAi_KNAA_Total_Brood vs WRM66_GFPRNAi_NGM_Total_Brood	-194.661	24.3107	0	Yes
Dunnett's test (Control Group = WRM66_ctrlRNAi_KNAA_Total_Brood)
Group vs. Group (Contrast)	Difference	Test Statistic	p-value	Significant
WRM66_ctrlRNAi_NGM_Total_Brood vs WRM66_ctrlRNAi_KNAA_Total_Brood	33.1678	4.50886	3.34887e-05	Yes
WRM66_GFPRNAi_KNAA_Total_Brood vs WRM66_ctrlRNAi_KNAA_Total_Brood	-135.811	18.7386	0	Yes
WRM66_GFPRNAi_NGM_Total_Brood vs WRM66_ctrlRNAi_KNAA_Total_Brood	58.8505	8.44857	1.15463e-14	Yes
Analysis of Variance (One-Way) for WRM66 Total Viable Brood
Descriptive Statistics
Groups	Sample size	Sum	Variance	Std Dev	Mean	95% Confidence Interval*
WRM66_ctrlRNAi_KNAA_Total_Viable	83	11149	1833.08	42.8144	134.325	124.977	143.674
WRM66_ctrlRNAi_NGM_Total_Viable	43	7259	2312.68	48.0903	168.814	154.014	183.614
WRM66_GFPRNAi_KNAA_Total_Viable	45	47	2.54343	1.59481	1.04444	0.565309	1.52358
WRM66_GFPRNAi_NGM_Total_Viable	51	9942	1982.22	44.5221	194.941	182.419	207.463
Total	222		6223.75	78.8908	127.914
Confidence intervals are calculated using individual standard deviations.
ANOVA
Source of Variation	d.f.	SS	MS	F	p-value	F crit	Omega Sqr.
Between Groups	3	1.02878e+06	342927	215.648	0	2.64601	0.743632
Within Groups	218	346667	1590.22
Total	221	1.37545e+06
Model summary
R-Squared	0.747961
Adjusted R-Squared	0.744492
Residual standard error	39.8775
Coefficient of Variation	0.311752
Homogeneity of Variances
Hartley Fmax		909.274	p-value	< 0.001
Cochran C		0.377241	p-value	0.00865369
Bartlett's Chi-square (d.f. = 3)		242.874	p-value	0
Levene's F (Based on mean)		25.0406	p-value	5.83977e-14
Brown-Forsythe (Based on median)		24.2692	p-value	1.3689e-13
Comparisons among groups (Factor 1 - Factor #1)
Scheffe
Group vs. Group (Contrast)	Difference	95% Confidence Interval		Test Statistic	p-value
WRM66_ctrlRNAi_KNAA_Total_Viable vs WRM66_ctrlRNAi_NGM_Total_Viable	-34.4887	-55.5991	-13.3782	4.60295	0.000149526
WRM66_ctrlRNAi_KNAA_Total_Viable vs WRM66_GFPRNAi_KNAA_Total_Viable	133.281	112.482	154.08	18.0543	0
WRM66_ctrlRNAi_KNAA_Total_Viable vs WRM66_GFPRNAi_NGM_Total_Viable	-60.6159	-80.6059	-40.6259	8.54338	1.28009e-13
WRM66_ctrlRNAi_NGM_Total_Viable vs WRM66_GFPRNAi_KNAA_Total_Viable	167.77	143.81	191.729	19.728	0
WRM66_ctrlRNAi_NGM_Total_Viable vs WRM66_GFPRNAi_NGM_Total_Viable	-26.1272	-49.3883	-2.86616	3.16461	0.0202164
WRM66_GFPRNAi_KNAA_Total_Viable vs WRM66_GFPRNAi_NGM_Total_Viable	-193.897	-216.876	-170.918	23.7738	0
Tukey-Kramer
Groups	Difference	Test Statistic	p-value	Significant
WRM66_ctrlRNAi_KNAA_Total_Viable vs WRM66_ctrlRNAi_NGM_Total_Viable	-34.4887	6.50955	0.746267	No
WRM66_ctrlRNAi_KNAA_Total_Viable vs WRM66_GFPRNAi_KNAA_Total_Viable	133.281	25.5326	0.74626	No
WRM66_ctrlRNAi_KNAA_Total_Viable vs WRM66_GFPRNAi_NGM_Total_Viable	-60.6159	12.0822	0.74626	No
WRM66_ctrlRNAi_NGM_Total_Viable vs WRM66_GFPRNAi_KNAA_Total_Viable	167.77	27.8997	0.74626	No
WRM66_ctrlRNAi_NGM_Total_Viable vs WRM66_GFPRNAi_NGM_Total_Viable	-26.1272	4.47544	0.748361	No
WRM66_GFPRNAi_KNAA_Total_Viable vs WRM66_GFPRNAi_NGM_Total_Viable	-193.897	33.6212	0.74626	No
Bonferroni
Alpha/N	0.00833333
Group vs. Group (Contrast)	Difference	95% Confidence Interval		Test Statistic	p-value
WRM66_ctrlRNAi_KNAA_Total_Viable vs WRM66_ctrlRNAi_NGM_Total_Viable	-34.4887	-54.4384	-14.5389	4.60295	4.24295e-05
WRM66_ctrlRNAi_KNAA_Total_Viable vs WRM66_GFPRNAi_KNAA_Total_Viable	133.281	113.625	152.936	18.0543	0
WRM66_ctrlRNAi_KNAA_Total_Viable vs WRM66_GFPRNAi_NGM_Total_Viable	-60.6159	-79.5068	-41.7249	8.54338	1.33227e-14
WRM66_ctrlRNAi_NGM_Total_Viable vs WRM66_GFPRNAi_KNAA_Total_Viable	167.77	145.127	190.412	19.728	0
WRM66_ctrlRNAi_NGM_Total_Viable vs WRM66_GFPRNAi_NGM_Total_Viable	-26.1272	-48.1094	-4.14505	3.16461	0.0106476
WRM66_GFPRNAi_KNAA_Total_Viable vs WRM66_GFPRNAi_NGM_Total_Viable	-193.897	-215.612	-172.181	23.7738	0
Fisher LSD
Group vs. Group (Contrast)	Difference	Test Statistic	p-value	Significant
WRM66_ctrlRNAi_KNAA_Total_Viable vs WRM66_ctrlRNAi_NGM_Total_Viable	-34.4887	4.60295	7.03961e-06	Yes
WRM66_ctrlRNAi_KNAA_Total_Viable vs WRM66_GFPRNAi_KNAA_Total_Viable	133.281	18.0543	0	Yes
WRM66_ctrlRNAi_KNAA_Total_Viable vs WRM66_GFPRNAi_NGM_Total_Viable	-60.6159	8.54338	2.22045e-15	Yes
WRM66_ctrlRNAi_NGM_Total_Viable vs WRM66_GFPRNAi_KNAA_Total_Viable	167.77	19.728	0	Yes
WRM66_ctrlRNAi_NGM_Total_Viable vs WRM66_GFPRNAi_NGM_Total_Viable	-26.1272	3.16461	0.00177251	Yes
WRM66_GFPRNAi_KNAA_Total_Viable vs WRM66_GFPRNAi_NGM_Total_Viable	-193.897	23.7738	0	Yes
Dunnett's test (Control Group = WRM66_ctrlRNAi_KNAA_Total_Viable)
Group vs. Group (Contrast)	Difference	Test Statistic	p-value	Significant
WRM66_ctrlRNAi_NGM_Total_Viable vs WRM66_ctrlRNAi_KNAA_Total_Viable	34.4887	4.60295	2.04758e-05	Yes
WRM66_GFPRNAi_KNAA_Total_Viable vs WRM66_ctrlRNAi_KNAA_Total_Viable	-133.281	18.0543	0	Yes
WRM66_GFPRNAi_NGM_Total_Viable vs WRM66_ctrlRNAi_KNAA_Total_Viable	60.6159	8.54338	7.99361e-15	Yes

## Sheet: Figure 4 Data
WRM94embryo_noaux	WRM94viable_noaux	WRM94hatch_noaux	WRM94embryo_aux	WRM94viable_aux	WRM94hatch_aux	WRM92embryo_noaux	WRM92viable_noaux	WRM92hatch_noaux	WRM92embryo_aux	WRM92viable_aux	WRM92hatch_aux	WRM66embryo_noaux	WRM66viable_noaux	WRM66hatch_noaux	WRM66embryo_aux	WRM66viable_aux	WRM66hatch_aux
220	220	1	0	0	0	249	249	1	26	0	0	269	269	1	269	242	0.89963
169	169	1	0	0	0	190	190	1	9	0	0	260	260	1	227	211	0.92952
175	175	1	0	0	0	246	246	1	44	0	0	249	249	1	266	264	0.99248
155	155	1	0	0	0	230	230	1	15	0	0	210	210	1	244	206	0.84426
106	106	1	0	0	0	267	267	1	36	0	0	161	161	1	257	242	0.94163
92	92	1	0	0	0	283	283	1	51	0	0	244	244	1	220	220	1
109	109	1	0	0	0	211	211	1	45	0	0	252	252	1	223	223	1
105	105	1	0	0	0	237	237	1	21	0	0	278	278	1	238	224	0.94118
104	104	1	0	0	0	109	109	1	5	0	0	247	243	0.98381	194	178	0.91753
124	124	1	0	0	0	257	257	1	47	0	0	194	194	1	283	283	1
72	72	1	0	0	0	275	275	1	9	0	0	246	241	0.97967	237	237	1
124	124	1	0	0	0	262	262	1	0	0	0	259	259	1	210	208	0.99048
95	95	1	0	0	0	303	303	1	1	0	0	260	260	1	224	223	0.99554
44	44	1	0	0	0	279	279	1	13	0	0	202	202	1	227	227	1
130	130	1	0	0	0	342	342	1	10	0	0	257	257	1	205	205	1
138	138	1	0	0	0	302	302	1	16	0	0	268	268	1	136	136	1
193	193	1	0	0	0	229	229	1	12	0	0	269	269	1	256	222	0.86719
149	149	1	0	0	0	333	333	1	5	0	0	235	235	1	203	203	1
177	177	1	0	0	0	242	242	1	33	0	0	225	225	1	105	101	0.9619
91	91	1	0	0	0	225	217	0.96444	36	0	0	247	247	1	260	260	1
198	198	1	0	0	0	218	218	1	0	0	0	193	193	1	148	143	0.96622
137	137	1	0	0	0	255	255	1	57	0	0	228	228	1	264	264	1
79	79	1	0	0	0	182	176	0.96703	21	0	0	136	136	1	168	164	0.97619
158	158	1	0	0	0	222	215	0.96847	40	0	0	147	147	1	194	194	1
180	180	1	0	0	0	308	308	1	27	0	0	260	260	1	185	185	1
152	152	1	0	0	0	206	206	1	5	0	0	302	302	1	173	173	1
190	190	1	0	0	0	302	302	1	17	0	0	291	291	1	173	168	0.9711
163	163	1	0	0	0	290	263	0.9069	9	0	0	262	262	1	156	156	1
198	198	1	0	0	0	254	254	1	0	0	0	243	243	1	140	133	0.95
189	189	1	0	0	0	315	315	1	54	0	0	268	268	1	172	171	0.99419
198	198	1	0	0	0	240	214	0.89167	21	0	0	153	153	1	232	232	1
150	150	1	0	0	0	327	327	1	32	0	0	204	204	1	51	36	0.70588
183	183	1	0	0	0	285	285	1	35	0	0	276	276	1	225	225	1
104	104	1	0	0	0	279	279	1	21	0	0	267	267	1	94	90	0.95745
142	142	1	0	0	0	246	246	1	2	0	0	231	231	1	213	212	0.99531
166	166	1	0	0	0	348	348	1	16	0	0	255	255	1	172	167	0.97093
177	177	1	0	0	0	348	348	1	0	0	0	248	248	1	225	225	1
202	202	1	0	0	0	361	361	1	20	0	0	237	237	1	166	163	0.98193
231	231	1	0	0	0	325	325	1	74	0	0	271	271	1	160	160	1
207	207	1	0	0	0	172	172	1	30	0	0	172	172	1	235	235	1
268	268	1	0	0	0	332	332	1	82	0	0	184	184	1	236	236	1
270	270	1	0	0	0	340	340	1	122	0	0	274	274	1
89	89	1	0	0	0	274	274	1	108	0	0	236	236	1
270	270	1	0	0	0	325	325	1	5	0	0	219	219	1
207	207	1	0	0	0	200	194	0.97	26	0	0	219	219	1
			0	0	0	272	272	1	36	0	0	209	209	1
			0	0	0	237	237	1	22	0	0	258	258	1
			0	0	0	237	233	0.98312	68	0	0	315	315	1
			0	0	0	168	168	1	50	0	0	122	122	1
			0	0	0	163	158	0.96933	85	0	0	294	294	1
						239	239	1	25	0	0	210	210	1
									7	0	0	131	131	1
									86	0	0	292	292	1
									58	0	0	267	267	1
									28	0	0	270	260	0.96296
									18	0	0	217	200	0.92166
									60	0	0	223	223	1
									56	0	0	239	227	0.94979
									24	0	0
									49	0	0
									48	0	0
									28	0	0
									40	0	0
									48	0	0
									71	0	0
									38	0	0
									29	0	0

## Sheet: Figure 4 Statistics
Analysis of Variance (One-Way) brood size
Descriptive Statistics
Groups	Sample size	Sum	Variance	Std Dev	Mean	95% Confidence Interval*
66embryo_aux	41	8266	2617.29	51.1595	201.61	185.462	217.758
66embryo_noaux	58	13655	1914.78	43.7582	235.431	223.925	246.937
92embryo_aux	67	2232	704.431	26.5411	33.3134	26.8395	39.7873
92embryo_noaux	51	13341	3083.69	55.531	261.588	245.97	277.207
94embryo_aux	50	0	0	0	0	0	0
94embryo_noaux	45	7080	2858.09	53.4611	157.333	141.272	173.395
Total	312		11998.8	109.539	142.865
Confidence intervals are calculated using individual standard deviations.
ANOVA
Source of Variation	d.f.	SS	MS	F	p-value	F crit	Omega Sqr.
Between Groups	5	3.19136e+06	638272	361.509	0	2.2435	0.85245
Within Groups	306	540267	1765.58
Total	311	3.73163e+06
Model summary
R-Squared	0.85522
Adjusted R-Squared	0.85285
Residual standard error	42.0188
Coefficient of Variation	0.29411
Homogeneity of Variances
Hartley Fmax		#N/A	p-value	#N/A
Cochran C		0.27586	p-value	0.00382
Comparisons among groups (Factor 1 - Factor #1)
Scheffe
Group vs. Group (Contrast)	Difference	95% Confidence Interval		Test Statistic	p-value
66embryo_aux vs 66embryo_noaux	-33.8213	-62.5359	-5.10669	3.94489	0.00933
66embryo_aux vs 92embryo_aux	168.296	140.392	196.201	20.1999	0
66embryo_aux vs 92embryo_noaux	-59.9785	-89.4979	-30.4591	6.80511	3.16522e-08
66embryo_aux vs 94embryo_aux	201.61	171.959	231.26	22.7732	0
66embryo_aux vs 94embryo_noaux	44.2764	13.8926	74.6602	4.88065	0.00033
66embryo_noaux vs 92embryo_aux	202.118	176.877	227.358	26.8199	0
66embryo_noaux vs 92embryo_noaux	-26.1572	-53.1722	0.85781	3.2429	0.06491
66embryo_noaux vs 94embryo_aux	235.431	208.273	262.589	29.034	0
66embryo_noaux vs 94embryo_noaux	78.0977	50.1408	106.055	9.35614	0
92embryo_aux vs 92embryo_noaux	-228.275	-254.427	-202.123	29.2345	0
92embryo_aux vs 94embryo_aux	33.3134	7.01308	59.6138	4.24234	0.00353
92embryo_aux vs 94embryo_noaux	-124.02	-151.144	-96.8957	15.3138	0
92embryo_noaux vs 94embryo_aux	261.588	233.58	289.596	31.2813	0
92embryo_noaux vs 94embryo_noaux	104.255	75.472	133.038	12.1313	0
94embryo_aux vs 94embryo_noaux	-157.333	-186.251	-128.416	18.2224	0
Tukey HSD
Groups	Difference	Test Statistic	p-value	Significant
66embryo_aux vs 66embryo_noaux	-33.8213	5.15393	0.74713	No
66embryo_aux vs 92embryo_aux	168.296	25.6462	0.74616	No
66embryo_aux vs 92embryo_noaux	-59.9785	9.13995	0.74616	No
66embryo_aux vs 94embryo_aux	201.61	30.7228	0.74616	No
66embryo_aux vs 94embryo_noaux	44.2764	6.74716	0.74617	No
66embryo_noaux vs 92embryo_aux	202.118	30.8001	0.74616	No
66embryo_noaux vs 92embryo_noaux	-26.1572	3.98602	0.76007	No
66embryo_noaux vs 94embryo_aux	235.431	35.8767	0.74616	No
66embryo_noaux vs 94embryo_noaux	78.0977	11.9011	0.74616	No
92embryo_aux vs 92embryo_noaux	-228.275	34.7862	0.74616	No
92embryo_aux vs 94embryo_aux	33.3134	5.07654	0.74734	No
92embryo_aux vs 94embryo_noaux	-124.02	18.899	0.74616	No
92embryo_noaux vs 94embryo_aux	261.588	39.8627	0.74616	No
92embryo_noaux vs 94embryo_noaux	104.255	15.8871	0.74616	No
94embryo_aux vs 94embryo_noaux	-157.333	23.9756	0.74616	No
Tukey B
Groups	Difference	Test Statistic	p-value	Significant
92embryo_aux vs 94embryo_aux (df = 2)	-33.3134	5.07654	0.7468	No
94embryo_aux vs 94embryo_noaux (df = 3)	-157.333	23.9756	0.74614	No
66embryo_aux vs 94embryo_aux (df = 4)	-201.61	30.7228	0.74618	No
66embryo_noaux vs 94embryo_aux (df = 5)	-235.431	35.8767	0.74617	No
92embryo_noaux vs 94embryo_aux (df = 6)	-261.588	39.8627	0.74616	No
92embryo_aux vs 94embryo_noaux (df = 2)	-124.02	18.899	0.74617	No
66embryo_aux vs 92embryo_aux (df = 3)	-168.296	25.6462	0.74614	No
66embryo_noaux vs 92embryo_aux (df = 4)	-202.118	30.8001	0.74618	No
92embryo_aux vs 92embryo_noaux (df = 5)	-228.275	34.7862	0.74617	No
66embryo_aux vs 94embryo_noaux (df = 2)	-44.2764	6.74716	0.74617	No
66embryo_noaux vs 94embryo_noaux (df = 3)	-78.0977	11.9011	0.74614	No
92embryo_noaux vs 94embryo_noaux (df = 4)	-104.255	15.8871	0.74618	No
66embryo_aux vs 66embryo_noaux (df = 2)	-33.8213	5.15393	0.74669	No
66embryo_aux vs 92embryo_noaux (df = 3)	-59.9785	9.13995	0.74614	No
66embryo_noaux vs 92embryo_noaux (df = 2)	-26.1572	3.98602	0.75375	No
Neuman-Keuls
Groups	Difference	Test Statistic	p-value	Significant
92embryo_aux vs 94embryo_aux (df = 2)	-33.3134	5.07654	0.74626	No
94embryo_aux vs 94embryo_noaux (df = 3)	-157.333	23.9756	0.74612	No
66embryo_aux vs 94embryo_aux (df = 4)	-201.61	30.7228	0.7462	No
66embryo_noaux vs 94embryo_aux (df = 5)	-235.431	35.8767	0.74618	No
92embryo_noaux vs 94embryo_aux (df = 6)	-261.588	39.8627	0.74616	No
92embryo_aux vs 94embryo_noaux (df = 2)	-124.02	18.899	0.74617	No
66embryo_aux vs 92embryo_aux (df = 3)	-168.296	25.6462	0.74612	No
66embryo_noaux vs 92embryo_aux (df = 4)	-202.118	30.8001	0.7462	No
92embryo_aux vs 92embryo_noaux (df = 5)	-228.275	34.7862	0.74618	No
66embryo_aux vs 94embryo_noaux (df = 2)	-44.2764	6.74716	0.74617	No
66embryo_noaux vs 94embryo_noaux (df = 3)	-78.0977	11.9011	0.74612	No
92embryo_noaux vs 94embryo_noaux (df = 4)	-104.255	15.8871	0.7462	No
66embryo_aux vs 66embryo_noaux (df = 2)	-33.8213	5.15393	0.74624	No
66embryo_aux vs 92embryo_noaux (df = 3)	-59.9785	9.13995	0.74612	No
66embryo_noaux vs 92embryo_noaux (df = 2)	-26.1572	3.98602	0.74742	No
Bonferroni
Alpha/N	0.00333
Group vs. Group (Contrast)	Difference	95% Confidence Interval		Test Statistic	p-value
66embryo_aux vs 66embryo_noaux	-33.8213	-59.1852	-8.4574	3.94489	0.00149
66embryo_aux vs 92embryo_aux	168.296	143.648	192.945	20.1999	0
66embryo_aux vs 92embryo_noaux	-59.9785	-86.0533	-33.9037	6.80511	7.98958e-10
66embryo_aux vs 94embryo_aux	201.61	175.419	227.8	22.7732	0
66embryo_aux vs 94embryo_noaux	44.2764	17.4381	71.1147	4.88065	3e-05
66embryo_noaux vs 92embryo_aux	202.118	179.823	224.413	26.8199	0
66embryo_noaux vs 92embryo_noaux	-26.1572	-50.0198	-2.29457	3.2429	0.01971
66embryo_noaux vs 94embryo_aux	235.431	211.442	259.42	29.034	0
66embryo_noaux vs 94embryo_noaux	78.0977	53.4031	102.792	9.35614	0
92embryo_aux vs 92embryo_noaux	-228.275	-251.375	-205.174	29.2345	0
92embryo_aux vs 94embryo_aux	33.3134	10.0821	56.5448	4.24234	0.00044
92embryo_aux vs 94embryo_noaux	-124.02	-147.979	-100.061	15.3138	0
92embryo_noaux vs 94embryo_aux	261.588	236.849	286.328	31.2813	0
92embryo_noaux vs 94embryo_noaux	104.255	78.8306	129.679	12.1313	0
94embryo_aux vs 94embryo_noaux	-157.333	-182.876	-131.79	18.2224	0
Fisher LSD
Group vs. Group (Contrast)	Difference	Test Statistic	p-value	Significant
66embryo_aux vs 66embryo_noaux	-33.8213	3.94489	0.0001	Yes
66embryo_aux vs 92embryo_aux	168.296	20.1999	0	Yes
66embryo_aux vs 92embryo_noaux	-59.9785	6.80511	5.2742e-11	Yes
66embryo_aux vs 94embryo_aux	201.61	22.7732	0	Yes
66embryo_aux vs 94embryo_noaux	44.2764	4.88065	1.69983e-06	Yes
66embryo_noaux vs 92embryo_aux	202.118	26.8199	0	Yes
66embryo_noaux vs 92embryo_noaux	-26.1572	3.2429	0.00131	Yes
66embryo_noaux vs 94embryo_aux	235.431	29.034	0	Yes
66embryo_noaux vs 94embryo_noaux	78.0977	9.35614	0	Yes
92embryo_aux vs 92embryo_noaux	-228.275	29.2345	0	Yes
92embryo_aux vs 94embryo_aux	33.3134	4.24234	3e-05	Yes
92embryo_aux vs 94embryo_noaux	-124.02	15.3138	0	Yes
92embryo_noaux vs 94embryo_aux	261.588	31.2813	0	Yes
92embryo_noaux vs 94embryo_noaux	104.255	12.1313	0	Yes
94embryo_aux vs 94embryo_noaux	-157.333	18.2224	0	Yes
Dunnett's test (Control Group = 66embryo_aux)
Group vs. Group (Contrast)	Difference	Test Statistic	p-value	Significant
66embryo_noaux vs 66embryo_aux	33.8213	3.94489	0.00046	***
92embryo_aux vs 66embryo_aux	-168.296	20.1999	0	Yes
92embryo_noaux vs 66embryo_aux	59.9785	6.80511	1.80161e-10	Yes
94embryo_aux vs 66embryo_aux	-201.61	22.7732	0	Yes
94embryo_noaux vs 66embryo_aux	-44.2764	4.88065	8.41999e-06	Yes
Analysis of Variance (One-Way) Hatch Rate
Descriptive Statistics
Groups	Sample size	Sum	Variance	Std Dev	Mean	95% Confidence Interval*
66hatch_aux	41	39.7505	0.00322	0.05673	0.96952	0.95162	0.98743
66hatch_noaux	58	57.7979	0.00018	0.01325	0.99652	0.99303	1
92hatch_aux	67	0	0	0	0	0	0
92hatch_noaux	51	50.621	0.00046	0.02147	0.99257	0.98653	0.99861
94hatch_aux	50	0	0	0	0	0	0
94hatch_noaux	45	45	0	0	1	1	1
Total	312		0.23133	0.48097	0.61913
Confidence intervals are calculated using individual standard deviations.
ANOVA
Source of Variation	d.f.	SS	MS	F	p-value	F crit	Omega Sqr.
Between Groups	5	71.7829	14.3566	27153	0	2.2435	0.99771
Within Groups	306	0.16179	0.00053
Total	311	71.9447
Model summary
R-Squared	0.99775
Adjusted R-Squared	0.99771
Residual standard error	0.02299
Coefficient of Variation	0.03714
Homogeneity of Variances
Hartley Fmax		#N/A	p-value	#N/A
Cochran C		0.83485	p-value	0
Comparisons among groups (Factor 1 - Factor #1)
Scheffe
Group vs. Group (Contrast)	Difference	95% Confidence Interval		Test Statistic	p-value
66hatch_aux vs 66hatch_noaux	-0.02699	-0.0427	-0.01128	5.7529	7.20125e-06
66hatch_aux vs 92hatch_aux	0.96952	0.95425	0.98479	212.647	0
66hatch_aux vs 92hatch_noaux	-0.02304	-0.0392	-0.00689	4.77758	0.0005
66hatch_aux vs 94hatch_aux	0.96952	0.9533	0.98575	200.124	0
66hatch_aux vs 94hatch_noaux	-0.03048	-0.0471	-0.01385	6.13877	1.08515e-06
66hatch_noaux vs 92hatch_aux	0.99652	0.9827	1.01033	241.637	0
66hatch_noaux vs 92hatch_noaux	0.00395	-0.01084	0.01873	0.89435	0.97686
66hatch_noaux vs 94hatch_aux	0.99652	0.98165	1.01138	224.572	0
66hatch_noaux vs 94hatch_noaux	-0.00348	-0.01878	0.01181	0.76285	0.98871
92hatch_aux vs 92hatch_noaux	-0.99257	-1.00688	-0.97826	232.287	0
92hatch_aux vs 94hatch_aux	0	-0.01439	0.01439	0	1
92hatch_aux vs 94hatch_noaux	-1	-1.01484	-0.98516	225.641	0
92hatch_noaux vs 94hatch_aux	0.99257	0.97724	1.00789	216.897	0
92hatch_noaux vs 94hatch_noaux	-0.00743	-0.02318	0.00832	1.58037	0.77656
94hatch_aux vs 94hatch_noaux	-1	-1.01582	-0.98418	211.647	0
Tukey HSD
Groups	Difference	Test Statistic	p-value	Significant
66hatch_aux vs 66hatch_noaux	-0.02699	7.51606	0.74616	No
66hatch_aux vs 92hatch_aux	0.96952	269.982	0.74616	No
66hatch_aux vs 92hatch_noaux	-0.02304	6.41677	0.74619	No
66hatch_aux vs 94hatch_aux	0.96952	269.982	0.74616	No
66hatch_aux vs 94hatch_noaux	-0.03048	8.48641	0.74616	No
66hatch_noaux vs 92hatch_aux	0.99652	277.498	0.74616	No
66hatch_noaux vs 92hatch_noaux	0.00395	1.09929	0.99274	No
66hatch_noaux vs 94hatch_aux	0.99652	277.498	0.74616	No
66hatch_noaux vs 94hatch_noaux	-0.00348	0.97035	0.99582	No
92hatch_aux vs 92hatch_noaux	-0.99257	276.398	0.74616	No
92hatch_aux vs 94hatch_aux	0	0	1	No
92hatch_aux vs 94hatch_noaux	-1	278.468	0.74616	No
92hatch_noaux vs 94hatch_aux	0.99257	276.398	0.74616	No
92hatch_noaux vs 94hatch_noaux	-0.00743	2.06964	0.92075	No
94hatch_aux vs 94hatch_noaux	-1	278.468	0.74616	No
Tukey B
Groups	Difference	Test Statistic	p-value	Significant
92hatch_aux vs 94hatch_aux (df = 2)	0	0	1	No
66hatch_aux vs 92hatch_aux (df = 3)	-0.96952	269.982	0.74614	No
92hatch_aux vs 92hatch_noaux (df = 4)	-0.99257	276.398	0.74618	No
66hatch_noaux vs 92hatch_aux (df = 5)	-0.99652	277.498	0.74617	No
92hatch_aux vs 94hatch_noaux (df = 6)	-1	278.468	0.74616	No
66hatch_aux vs 94hatch_aux (df = 2)	-0.96952	269.982	0.74617	No
92hatch_noaux vs 94hatch_aux (df = 3)	-0.99257	276.398	0.74614	No
66hatch_noaux vs 94hatch_aux (df = 4)	-0.99652	277.498	0.74618	No
94hatch_aux vs 94hatch_noaux (df = 5)	-1	278.468	0.74617	No
66hatch_aux vs 92hatch_noaux (df = 2)	-0.02304	6.41677	0.74618	No
66hatch_aux vs 66hatch_noaux (df = 3)	-0.02699	7.51606	0.74614	No
66hatch_aux vs 94hatch_noaux (df = 4)	-0.03048	8.48641	0.74618	No
66hatch_noaux vs 92hatch_noaux (df = 2)	-0.00395	1.09929	0.92488	No
92hatch_noaux vs 94hatch_noaux (df = 3)	-0.00743	2.06964	0.87247	No
66hatch_noaux vs 94hatch_noaux (df = 2)	-0.00348	0.97035	0.93349	No
Neuman-Keuls
Groups	Difference	Test Statistic	p-value	Significant
92hatch_aux vs 94hatch_aux (df = 2)	0	0	1	No
66hatch_aux vs 92hatch_aux (df = 3)	-0.96952	269.982	0.74612	No
92hatch_aux vs 92hatch_noaux (df = 4)	-0.99257	276.398	0.7462	No
66hatch_noaux vs 92hatch_aux (df = 5)	-0.99652	277.498	0.74618	No
92hatch_aux vs 94hatch_noaux (df = 6)	-1	278.468	0.74616	No
66hatch_aux vs 94hatch_aux (df = 2)	-0.96952	269.982	0.74617	No
92hatch_noaux vs 94hatch_aux (df = 3)	-0.99257	276.398	0.74612	No
66hatch_noaux vs 94hatch_aux (df = 4)	-0.99652	277.498	0.7462	No
94hatch_aux vs 94hatch_noaux (df = 5)	-1	278.468	0.74618	No
66hatch_aux vs 92hatch_noaux (df = 2)	-0.02304	6.41677	0.74617	No
66hatch_aux vs 66hatch_noaux (df = 3)	-0.02699	7.51606	0.74612	No
66hatch_aux vs 94hatch_noaux (df = 4)	-0.03048	8.48641	0.7462	No
66hatch_noaux vs 92hatch_noaux (df = 2)	-0.00395	1.09929	0.85703	No
92hatch_noaux vs 94hatch_noaux (df = 3)	-0.00743	2.06964	0.82418	No
66hatch_noaux vs 94hatch_noaux (df = 2)	-0.00348	0.97035	0.87116	No
Bonferroni
Alpha/N	0.00333
Group vs. Group (Contrast)	Difference	95% Confidence Interval		Test Statistic	p-value
66hatch_aux vs 66hatch_noaux	-0.02699	-0.04087	-0.01311	5.7529	3.19116e-07
66hatch_aux vs 92hatch_aux	0.96952	0.95604	0.98301	212.647	0
66hatch_aux vs 92hatch_noaux	-0.02304	-0.03731	-0.00877	4.77758	4e-05
66hatch_aux vs 94hatch_aux	0.96952	0.95519	0.98386	200.124	0
66hatch_aux vs 94hatch_noaux	-0.03048	-0.04516	-0.01579	6.13877	3.86321e-08
66hatch_noaux vs 92hatch_aux	0.99652	0.98431	1.00872	241.637	0
66hatch_noaux vs 92hatch_noaux	0.00395	-0.00911	0.01701	0.89435	1
66hatch_noaux vs 94hatch_aux	0.99652	0.98339	1.00964	224.572	0
66hatch_noaux vs 94hatch_noaux	-0.00348	-0.017	0.01003	0.76285	1
92hatch_aux vs 92hatch_noaux	-0.99257	-1.00521	-0.97993	232.287	0
92hatch_aux vs 94hatch_aux	0	-0.01271	0.01271	0	1
92hatch_aux vs 94hatch_noaux	-1	-1.01311	-0.98689	225.641	0
92hatch_noaux vs 94hatch_aux	0.99257	0.97903	1.00611	216.897	0
92hatch_noaux vs 94hatch_noaux	-0.00743	-0.02135	0.00648	1.58037	1
94hatch_aux vs 94hatch_noaux	-1	-1.01398	-0.98602	211.647	0
Fisher LSD
Group vs. Group (Contrast)	Difference	Test Statistic	p-value	Significant
66hatch_aux vs 66hatch_noaux	-0.02699	5.7529	2.11603e-08	Yes
66hatch_aux vs 92hatch_aux	0.96952	212.647	0	Yes
66hatch_aux vs 92hatch_noaux	-0.02304	4.77758	2.74993e-06	Yes
66hatch_aux vs 94hatch_aux	0.96952	200.124	0	Yes
66hatch_aux vs 94hatch_noaux	-0.03048	6.13877	2.55801e-09	Yes
66hatch_noaux vs 92hatch_aux	0.99652	241.637	0	Yes
66hatch_noaux vs 92hatch_noaux	0.00395	0.89435	0.37184	No
66hatch_noaux vs 94hatch_aux	0.99652	224.572	0	Yes
66hatch_noaux vs 94hatch_noaux	-0.00348	0.76285	0.44614	No
92hatch_aux vs 92hatch_noaux	-0.99257	232.287	0	Yes
92hatch_aux vs 94hatch_aux	0	0	1	No
92hatch_aux vs 94hatch_noaux	-1	225.641	0	Yes
92hatch_noaux vs 94hatch_aux	0.99257	216.897	0	Yes
92hatch_noaux vs 94hatch_noaux	-0.00743	1.58037	0.11505	No
94hatch_aux vs 94hatch_noaux	-1	211.647	0	Yes
Dunnett's test (Control Group = 66hatch_aux)
Group vs. Group (Contrast)	Difference	Test Statistic	p-value	Significant
66hatch_noaux vs 66hatch_aux	0.02699	5.7529	1.14644e-07	Yes
92hatch_aux vs 66hatch_aux	-0.96952	212.647	0	Yes
92hatch_noaux vs 66hatch_aux	0.02304	4.77758	1e-05	Yes
94hatch_aux vs 66hatch_aux	-0.96952	200.124	0	Yes
94hatch_noaux vs 66hatch_aux	0.03048	6.13877	4.92312e-09	Yes

## Sheet: Figure 5 Data
WRM66_NGM_FractionPoly	WRM66_KNAA_FractionPoly	WRM92_NGM_FractionPoly	WRM92_KNAA_FractionPoly	WRM66_NGM_FM464	WRM66_KNAA_FM464	WRM92_NGM_FM464	WRM92_KNAA_FM464
0	0	0	0.666667	254.741	102.409	101.268	1873.69
0	0	0	0.333333	221.414	99.616	113.506	2819.72
0	0	0	0.6	154.862	112.932	110.5	1678.97
0	0	0	0.428571	150.678	120.936	584.427	1702.36
0	0	0	0.8	216.213	109.732	217.102	1579.62
0	0	0	0.8	249.48	1217.63	365.182	1744.18
0	0	0	0.857143	207.275	155.471	521.155	1191.02
0	0	0	0.25	209.242	1157.06	897.454	3278.1
0	0	0	0.5	207.854	561.623	83.761	2292.71
0	0	0	0	189.777	1498.26	83.938	3891.86
0	0	0	0	251.016	108.534	357.928	1861.26
0	0	0	0.5	251.476	104.704	224.101	1201.18
0	0	0	0.857143	215.017	107.39	2153.02	2921.68
	0	0	0.333333	214.239	116.818	91.813	2881.28
	0	0	0.4	236.563	1191.07	276.098	1747.82
	0	0	0.25	247.063	1381.62	156.786	1434.56
	0	0	0.5	98.105	541.617	392.065	2310.86
	0	0	0.5	113.134	1678.35	80.8	4405.15
	0		0.8	111.77	101.735	83.17	6431.25
			1	122.936	131.759	84.992	76.589
			0.5	161.461	803.14	100.381	208.365
			0	584.713		99.001	470.425
			0.625	249.13		81.416	19518.3
				280.304		93.86	7363.44
						170.052	77.449
						194.623	197.62
							120.508
							7084.06
							5847.27
							833.847
							1935.38
							100.489
							291.943
							197.939
							799.174
							3701.31
							2686.48
							95.315
							4858.86
							5906.54
							3641.41
							3224.89
							272.971
							91.732

## Sheet: Figure 5 Statistics
Analysis of Variance (One-Way) of Fraction Polynucleated
Descriptive Statistics
Groups	Sample size	Sum	Variance	Std Dev	Mean	95% Confidence Interval*
WRM66_KNAA_FractionPoly	19	0	0	0	0	0	0
WRM66_NGM_FractionPoly	13	0	0	0	0	0	0
WRM92_KNAA_FractionPoly	23	11.5012	0.0806437	0.283978	0.500052	0.37725	0.622853
WRM92_NGM_FractionPoly	18	0	0	0	0	0	0
Total	73		0.0793519	0.281695	0.157551
Confidence intervals are calculated using individual standard deviations.
ANOVA
Source of Variation	d.f.	SS	MS	F	p-value	F crit	Omega Sqr.
Between Groups	3	3.93917	1.31306	51.0669	0	2.73749	0.67294
Within Groups	69	1.77416	0.0257125
Total	72	5.71333
Model summary
R-Squared	0.68947
Adjusted R-Squared	0.675969
Residual standard error	0.160351
Coefficient of Variation	1.01778
Homogeneity of Variances
Hartley Fmax		#N/A	p-value	#N/A
Cochran C		1	p-value	#N/A
Comparisons among groups (Factor 1 - Factor #1)
Scheffe
Group vs. Group (Contrast)	Difference	95% Confidence Interval		Test Statistic	p-value
WRM66_KNAA_FractionPoly vs WRM66_NGM_FractionPoly	0	-0.1654	0.1654	0	1
WRM66_KNAA_FractionPoly vs WRM92_KNAA_FractionPoly	-0.500052	-0.642512	-0.357592	10.0591	1.55098e-13
WRM66_KNAA_FractionPoly vs WRM92_NGM_FractionPoly	0	-0.151146	0.151146	0	1
WRM66_NGM_FractionPoly vs WRM92_KNAA_FractionPoly	-0.500052	-0.659502	-0.340602	8.98726	1.21659e-11
WRM66_NGM_FractionPoly vs WRM92_NGM_FractionPoly	0	-0.167256	0.167256	0	1
WRM92_KNAA_FractionPoly vs WRM92_NGM_FractionPoly	0.500052	0.355441	0.644663	9.90948	2.84106e-13
Tukey-Kramer
Groups	Difference	Test Statistic	p-value	Significant
WRM66_KNAA_FractionPoly vs WRM66_NGM_FractionPoly	0	0	1	No
WRM66_KNAA_FractionPoly vs WRM92_KNAA_FractionPoly	-0.500052	14.2257	-9.17833e-06	Yes
WRM66_KNAA_FractionPoly vs WRM92_NGM_FractionPoly	0	0	1	No
WRM66_NGM_FractionPoly vs WRM92_KNAA_FractionPoly	-0.500052	12.7099	-9.17833e-06	Yes
WRM66_NGM_FractionPoly vs WRM92_NGM_FractionPoly	0	0	1	No
WRM92_KNAA_FractionPoly vs WRM92_NGM_FractionPoly	0.500052	14.0141	-9.17833e-06	Yes
Bonferroni
Alpha/N	0.00833333
Group vs. Group (Contrast)	Difference	95% Confidence Interval		Test Statistic	p-value
WRM66_KNAA_FractionPoly vs WRM66_NGM_FractionPoly	0	-0.156784	0.156784	0	1
WRM66_KNAA_FractionPoly vs WRM92_KNAA_FractionPoly	-0.500052	-0.63509	-0.365013	10.0591	2.13163e-14
WRM66_KNAA_FractionPoly vs WRM92_NGM_FractionPoly	0	-0.143272	0.143272	0	1
WRM66_NGM_FractionPoly vs WRM92_KNAA_FractionPoly	-0.500052	-0.651195	-0.348908	8.98726	1.88916e-12
WRM66_NGM_FractionPoly vs WRM92_NGM_FractionPoly	0	-0.158543	0.158543	0	1
WRM92_KNAA_FractionPoly vs WRM92_NGM_FractionPoly	0.500052	0.362974	0.637129	9.90948	4.13003e-14
Fisher LSD
Group vs. Group (Contrast)	Difference	Test Statistic	p-value	Significant
WRM66_KNAA_FractionPoly vs WRM66_NGM_FractionPoly	0	0	1	No
WRM66_KNAA_FractionPoly vs WRM92_KNAA_FractionPoly	-0.500052	10.0591	2.66454e-15	Yes
WRM66_KNAA_FractionPoly vs WRM92_NGM_FractionPoly	0	0	1	No
WRM66_NGM_FractionPoly vs WRM92_KNAA_FractionPoly	-0.500052	8.98726	2.47802e-13	Yes
WRM66_NGM_FractionPoly vs WRM92_NGM_FractionPoly	0	0	1	No
WRM92_KNAA_FractionPoly vs WRM92_NGM_FractionPoly	0.500052	9.90948	5.10703e-15	Yes
Dunnett's test (Control Group = WRM66_KNAA_FractionPoly)
Group vs. Group (Contrast)	Difference	Test Statistic	p-value	Significant
WRM66_NGM_FractionPoly vs WRM66_KNAA_FractionPoly	0	0	#N/A	***
WRM92_KNAA_FractionPoly vs WRM66_KNAA_FractionPoly	0.500052	10.0591	2.22045e-16	Yes
WRM92_NGM_FractionPoly vs WRM66_KNAA_FractionPoly	0	0	#N/A	***
Analysis of Variance (One-Way) of FM4-64 Fluorescence
Descriptive Statistics
Groups	Sample size	Sum	Variance	Std Dev	Mean	95% Confidence Interval*
WRM66_KNAA_FM464	21	11402.4	321642	567.135	542.972	284.815	801.128
WRM66_NGM_FM464	24	5198.46	8850.49	94.0771	216.603	176.877	256.328
WRM92_KNAA_FM464	44	116850	1.08419e+07	3292.7	2655.67	1654.6	3656.75
WRM92_NGM_FM464	26	7718.4	182270	426.931	296.862	124.42	469.303
Total	115		5.4739e+06	2339.64	1227.56
Confidence intervals are calculated using individual standard deviations.
ANOVA
Source of Variation	d.f.	SS	MS	F	p-value	F crit	Omega Sqr.
Between Groups	3	1.4663e+08	4.88767e+07	11.3644	1.47586e-06	2.68638	0.212832
Within Groups	111	4.77394e+08	4.30085e+06
Total	114	6.24025e+08
Model summary
R-Squared	0.234975
Adjusted R-Squared	0.214299
Residual standard error	2073.85
Coefficient of Variation	1.68941
Homogeneity of Variances
Hartley Fmax		1225	p-value	< 0.001
Cochran C		0.954841	p-value	0
Bartlett's Chi-square (d.f. = 3)		229.642	p-value	0
Levene's F (Based on mean)		11.8225	p-value	8.87016e-07
Brown-Forsythe (Based on median)		8.59485	p-value	3.51759e-05
Comparisons among groups (Factor 1 - Factor #1)
Scheffe
Group vs. Group (Contrast)	Difference	95% Confidence Interval		Test Statistic	p-value
WRM66_KNAA_FM464 vs WRM66_NGM_FM464	326.369	-1432.82	2085.56	0.526673	0.96406
WRM66_KNAA_FM464 vs WRM92_KNAA_FM464	-2112.7	-3674.2	-551.199	3.84096	0.0030258
WRM66_KNAA_FM464 vs WRM92_NGM_FM464	246.11	-1481.22	1973.44	0.404482	0.983148
WRM66_NGM_FM464 vs WRM92_KNAA_FM464	-2439.07	-3933.05	-945.091	4.63473	0.000193676
WRM66_NGM_FM464 vs WRM92_NGM_FM464	-80.259	-1746.79	1586.28	0.136717	0.99932
WRM92_KNAA_FM464 vs WRM92_NGM_FM464	2358.81	902.487	3815.13	4.59812	0.000221846
Tukey HSD
Groups	Difference	Test Statistic	p-value	Significant
WRM66_KNAA_FM464 vs WRM66_NGM_FM464	326.369	0.721176	0.956633	No
WRM66_KNAA_FM464 vs WRM92_KNAA_FM464	-2112.7	4.66843	0.00702206	Yes
WRM66_KNAA_FM464 vs WRM92_NGM_FM464	246.11	0.543828	0.980645	No
WRM66_NGM_FM464 vs WRM92_KNAA_FM464	-2439.07	5.3896	0.00126734	Yes
WRM66_NGM_FM464 vs WRM92_NGM_FM464	-80.259	0.177348	0.999369	No
WRM92_KNAA_FM464 vs WRM92_NGM_FM464	2358.81	5.21225	0.00197624	Yes
Tukey B
Groups	Difference	Test Statistic	p-value	Significant
WRM66_NGM_FM464 vs WRM92_NGM_FM464 (df = 2)	-80.259	0.177348	0.949894	No
WRM66_KNAA_FM464 vs WRM66_NGM_FM464 (df = 3)	-326.369	0.721176	0.911651	No
WRM66_NGM_FM464 vs WRM92_KNAA_FM464 (df = 4)	-2439.07	5.3896	0.00126734	Yes
WRM66_KNAA_FM464 vs WRM92_NGM_FM464 (df = 2)	-246.11	0.543828	0.840925	No
WRM92_KNAA_FM464 vs WRM92_NGM_FM464 (df = 3)	-2358.81	5.21225	0.00151712	Yes
WRM66_KNAA_FM464 vs WRM92_KNAA_FM464 (df = 2)	-2112.7	4.66843	0.00419966	Yes
Neuman-Keuls
Groups	Difference	Test Statistic	p-value	Significant
WRM66_NGM_FM464 vs WRM92_NGM_FM464 (df = 2)	-80.259	0.177348	0.900419	No
WRM66_KNAA_FM464 vs WRM66_NGM_FM464 (df = 3)	-326.369	0.721176	0.86667	No
WRM66_NGM_FM464 vs WRM92_KNAA_FM464 (df = 4)	-2439.07	5.3896	0.00126734	Yes
WRM66_KNAA_FM464 vs WRM92_NGM_FM464 (df = 2)	-246.11	0.543828	0.701204	No
WRM92_KNAA_FM464 vs WRM92_NGM_FM464 (df = 3)	-2358.81	5.21225	0.001058	Yes
WRM66_KNAA_FM464 vs WRM92_KNAA_FM464 (df = 2)	-2112.7	4.66843	0.00137726	Yes
Bonferroni
Alpha/N	0.00833333
Group vs. Group (Contrast)	Difference	95% Confidence Interval		Test Statistic	p-value
WRM66_KNAA_FM464 vs WRM66_NGM_FM464	326.369	-1338.32	1991.06	0.526673	1
WRM66_KNAA_FM464 vs WRM92_KNAA_FM464	-2112.7	-3590.32	-635.081	3.84096	0.00122651
WRM66_KNAA_FM464 vs WRM92_NGM_FM464	246.11	-1388.43	1880.65	0.404482	1
WRM66_NGM_FM464 vs WRM92_KNAA_FM464	-2439.07	-3852.79	-1025.35	4.63473	5.88088e-05
WRM66_NGM_FM464 vs WRM92_NGM_FM464	-80.259	-1657.27	1496.75	0.136717	1
WRM92_KNAA_FM464 vs WRM92_NGM_FM464	2358.81	980.719	3736.9	4.59812	6.81796e-05
Fisher LSD
Group vs. Group (Contrast)	Difference	Test Statistic	p-value	Significant
WRM66_KNAA_FM464 vs WRM66_NGM_FM464	326.369	0.526673	0.599453	No
WRM66_KNAA_FM464 vs WRM92_KNAA_FM464	-2112.7	3.84096	0.000202716	Yes
WRM66_KNAA_FM464 vs WRM92_NGM_FM464	246.11	0.404482	0.686623	No
WRM66_NGM_FM464 vs WRM92_KNAA_FM464	-2439.07	4.63473	9.64647e-06	Yes
WRM66_NGM_FM464 vs WRM92_NGM_FM464	-80.259	0.136717	0.891498	No
WRM92_KNAA_FM464 vs WRM92_NGM_FM464	2358.81	4.59812	1.11883e-05	Yes
Dunnett's test (Control Group = WRM66_KNAA_FM464)
Group vs. Group (Contrast)	Difference	Test Statistic	p-value	Significant
WRM66_NGM_FM464 vs WRM66_KNAA_FM464	-326.369	0.526673	0.903135	No
WRM92_KNAA_FM464 vs WRM66_KNAA_FM464	2112.7	3.84096	0.000580118	***
WRM92_NGM_FM464 vs WRM66_KNAA_FM464	-246.11	0.404482	0.951772	No
