# Supplementary material
Source: HighWire-hosted journal article supplement (doi:10.1101/rna.080611.125)
Supplement: Supplementary_Table_and_Text_081325.docx [file Supplementary_Table_and_Text_081325.docx]

**SUPPLEMENTARY FILES**

1. Supplemental Figure 1: Multiple sequence alignment of the TZF regions.
2. Supplemental Figure 2: The calculated free energy of RNA folding
3. Supplemental Figure 3: Sample bleached embryo images
4. Supplemental Table 1: List of primers used in the study
5. Supplemental Data Set 1: Excel spreadsheet containing all data presented in the figures 1-5.
6. Supplemental Data Set 2: Excel spreadsheet of analyzed RNA-seq data in figure 7.
7. Supplemental Movie 1: Ovulation movie with K-NAA.
8. Supplemental Movie 2: Ovulation movie with standard NGM.

**SUPPLEMENTARY FIGURE LEGENDS**

**Supplemental Figure 1** Multiple sequence alignment of the TZF region from a subset of CCCH-type tandem zinc finger domain proteins from vertebrates (TTP, TIS11D) and nematodes (MEX-5, OMA-1, OMA-2, POS-1). Asterisks indicate conserved amino acids, colons indicate amino acid similarity. The gray boxes highlight the residues in zinc finger 1 and 2. The RRR region is shown in boldface type. Acidic and basic residues are highlighted in red and blue, respectively.

**Supplemental Figure 2** The calculated free energy of RNA folding for sequences that associate with OMA-1 is anticorrelated with the measured Hill coefficient (Zuker 2003; Kaymak and Ryder 2013). The free energies were calculated using m-fold (Zuker 2003) for RNA sequences with KD < 600 nM as listed in Figure 5a in Kaymak et.al . Each dot represents a different RNA sequence. The line represents a linear fit to the data.

**Supplemental Figure 3** Sample images comparing the state of bleached embryos recovered from *oma-1::GFP* (WT) and *oma-1::GFP* (AAA) mutant worms grown in the presence and absence of K-NAA. The scale bar represents 20 microns. Images were collected using a DIC optics at 400x total magnification.

**SUPPLEMENTARY MOVIE LEGENDS**

**Supplemental Movie 1** Example DIC (left) and GFP (right) movies are shown for an *oma-1::GFP (AAA)* animal in the presence of K-NAA (auxin). The time course in minutes is shown on the top left of each panel. The scale bar represents 20 microns.

**Supplemental Movie 2** Example DIC (left) and GFP (right) movies are shown for an *oma-1::GFP (AAA)* animal in the absence of K-NAA (auxin). The scale and time course are as in Supplemental Movie 1.

**SUPPLEMENTARY TABLE 1**

*PCR Primers:*

| Forward Primer | Sequence | Reverse Primer | Sequence | Use Case |
| --- | --- | --- | --- | --- |
| oma1_gtyp1 | GCCAGGATTCGATCAATTGGC | oma1_gtyp2 | TCGTGTTGGAACATATAACCTGAT | positive for presence of GFP tag on *oma-1* |
| P277F | CATTCAGAAGGATTTTGGCCCG | P278R | GGATGCGATGGTTCAACACTC | positive for presence of degron tag on *oma-2* |
| oma1_seq_F1 | CCGAATGCCCAGATTGGAG | oma1_seq_R2 | GCTGCAATGCGACCATTAGTC | AAA mutant, along with PstI restriction digest |
| CEH13357F | CACTCGATCACGCTAAGGACTTG | CEH13358R | GATCACGAATGTCAGCCAATGC | 666 bp for wild type *oma-1,*405 bp for TZF deletion |
| CEH13357F | CACTCGATCACGCTAAGGACTTG | CEH13359R | GAAGTTCCTCCTCTCCATGTGC | 385 bp for wild type *oma-1* |

*Strain Generation Primers:*

| Strain | Name | sgRNA1 | Name | sgRNA2 | Name | Oligo Donor |
| --- | --- | --- | --- | --- | --- | --- |
| WRM92 | sgRNA_92 | CAGTTTGATCCTAGACGCCG | n/a | n/a | Oma-1_AAA | ACCAGGTTGCACCTCCATTTCAACAGTTTGATCCTGCTGCTGCAGGATTAGCCCGAATGCAGAAACCAGAATCATACAA |
| COP2772 | sgRNA_94a | TCTGCATTCGGGCTAATCCG | sgRNA_94b | GTATGCGTTTGGTCCATGAT | pNU3644odn | CCTCCATTTCAACAGTTTGATCCTAGACGCCGCGGATTAGCCCGAATGCAGAAAGGACCAAACGCATACATTCCGCTGATAAACTTCT |

**SUPPLEMENTAL REFERENCES**

Kaymak E, Ryder SP. 2013. RNA recognition by the Caenorhabditis elegans oocyte maturation determinant OMA-1. *J Biol Chem* **288**: 30463-30472.

Zuker M. 2003. Mfold web server for nucleic acid folding and hybridization prediction. *Nucleic Acids Res* **31**: 3406-3415.
